# Supplementary material for: Monoterpenes Released from Fruit, Plant, and Vegetable Systems
Source: PubMed Central journal article supplement (PMC4239866; doi:10.3390/s141018286), 2014-09-29
Supplement: sensors-14-18286-s001.pdf [file sensors-14-18286-s001.pdf]

*Supplementary Information*

## **Monoterpenes Released from Fruit, Plant, and Vegetable Systems. *Sensors* 2014, 14, 18286-18301**

**Mohammad Asif Iqbal, Ki-Hyun Kim \* and Jeong Hyeon Ahn**

Atmospheric Environment Laboratory, Department of Civil and Environmental Engineering,  
Hanyang University, 222 Wangsimni-ro, Seoul 133-791, Korea;

E-Mails: iqbaldu88@gmail.com (M.A.I.); qq112311@gmail.com (J.H.A.)

\* Author to whom correspondence should be addressed; E-Mail: kkim61@hanyang.ac.kr or kkim61@nate.com; Tel.: +82-2-2220-2325; Fax: +82-2-2220-1945.

---

**Table S1.** Preparation procedures of liquid phase working standard (L-WS) of MTs used for ST/TD/GC analysis (by both MS and FID).

| <b>A. Preparation of Liquid Phase Standard for 10 Target MTs Selected in This Study</b> |                                          |                 |                                                         |            |                              |             |            |                               |                               |             |                               |             |          |
|-----------------------------------------------------------------------------------------|------------------------------------------|-----------------|---------------------------------------------------------|------------|------------------------------|-------------|------------|-------------------------------|-------------------------------|-------------|-------------------------------|-------------|----------|
|                                                                                         | <b>Compounds</b>                         | <b>Methanol</b> | <b><math>\alpha</math>-PN</b>                           | <b>CMP</b> | <b><math>\beta</math>-PN</b> | <b>3-CN</b> | <b>MRC</b> | <b><math>\alpha</math>-PD</b> | <b><math>\alpha</math>-TP</b> | <b>R-LN</b> | <b><math>\gamma</math>-TP</b> | <b>p-CM</b> | <b>T</b> |
| <b>RGC</b> <sup>a</sup>                                                                 | Purity (%)                               |                 | 99.0                                                    | 95.0       | 98.5                         | 98.5        | 95.0       | 95.0                          | 95.0                          | 99.0        | 98.5                          | 99.0        | 99.5     |
| <b>PS</b> <sup>b</sup>                                                                  | Volume ( $\mu$ L)                        | 8,790           | 1,000                                                   | 1,050      | 1,000                        | 1,000       | 1,160      | 1,000                         | 1,000                         | 1,000       | 1,000                         | 1,000       | 1,000    |
|                                                                                         | Concentration (ng/ $\mu$ L)              |                 | 42,471                                                  | 43,192     | 42,946                       | 42,207      | 43,584     | 40,375                        | 39,758                        | 41,679      | 41,863                        | 42,570      | 43,283   |
| <b>1st WS</b> <sup>c</sup>                                                              | Volume ( $\mu$ L)                        | 19,750          | 250                                                     | 250        | 250                          | 250         | 250        | 250                           | 250                           | 250         | 250                           | 250         | 250      |
|                                                                                         | Concentration (ng/ $\mu$ L)              |                 | 531                                                     | 540        | 537                          | 528         | 545        | 505                           | 497                           | 521         | 523                           | 532         | 541      |
| <b>B. Preparation of L-WS for DI and ST- Based Calibration</b>                          |                                          |                 |                                                         |            |                              |             |            |                               |                               |             |                               |             |          |
| <b>Order</b>                                                                            | <b>Mixing Volume (<math>\mu</math>L)</b> |                 | <b>Concentration<sup>d</sup> (ng/<math>\mu</math>L)</b> |            |                              |             |            |                               |                               |             |                               |             |          |
|                                                                                         | <b>1st WS</b>                            | <b>Methanol</b> | <b><math>\alpha</math>-PN</b>                           | <b>CMP</b> | <b><math>\beta</math>-PN</b> | <b>3-CN</b> | <b>MRC</b> | <b><math>\alpha</math>-PD</b> | <b><math>\alpha</math>-TP</b> | <b>R-LN</b> | <b><math>\gamma</math>-TP</b> | <b>p-CM</b> | <b>T</b> |
| 1                                                                                       | 14                                       | 1,486           | 5                                                       | 5          | 5                            | 5           | 5          | 5                             | 5                             | 5           | 5                             | 5           | 5        |
| 2                                                                                       | 28                                       | 1,472           | 10                                                      | 10         | 10                           | 10          | 10         | 9                             | 9                             | 10          | 10                            | 10          | 10       |
| 3                                                                                       | 56                                       | 1,444           | 20                                                      | 20         | 20                           | 20          | 20         | 19                            | 19                            | 19          | 20                            | 20          | 20       |
| 4                                                                                       | 140                                      | 1,360           | 50                                                      | 50         | 50                           | 49          | 51         | 47                            | 46                            | 49          | 49                            | 50          | 50       |
| 5                                                                                       | 280                                      | 1,220           | 99                                                      | 101        | 100                          | 98          | 102        | 94                            | 93                            | 97          | 98                            | 99          | 101      |
| 6                                                                                       | 850                                      | 650             | 301                                                     | 306        | 304                          | 299         | 309        | 286                           | 282                           | 295         | 297                           | 302         | 307      |

<sup>a</sup> Reagent grade chemicals; <sup>b</sup> PS: Dilution of pure chemicals (reagent grade chemical) to make 20 mL solution; <sup>c</sup> 1st L-WS: Dilution of PS to make in 20 mL solution; <sup>d</sup> Injection/loading volume on ST: 1  $\mu$ L.

**Table S2.** Instrumental setup and operational conditions for the gas chromatographic analysis of MTs.

| <b>A. Basic Information of Sorbent Tubes (STs) Prepared for the Absorption of MTs</b>                                            |                                      |                      |                                                |                           |                      |
|----------------------------------------------------------------------------------------------------------------------------------|--------------------------------------|----------------------|------------------------------------------------|---------------------------|----------------------|
| Sorbent material-                                                                                                                | Tenax TA + Carbopack B + Carbopack X |                      | Short name                                     | TBX                       |                      |
| Tube material                                                                                                                    | Quartz                               |                      | Amount of each sorbent                         | 50 mg (all in quartz)     |                      |
| Sorbents separated by                                                                                                            | Quartz wool                          |                      | Purge/sweeping gas                             | N <sub>2</sub> (99.999 %) |                      |
| <b>B. GC/MS System: QP2010, Shimadzu, Japan</b>                                                                                  |                                      |                      | <b>(b) Detector (MS)</b>                       |                           |                      |
| <b>(a) Oven setting</b>                                                                                                          |                                      |                      | Ionization mode:                               | EI (70 eV)                |                      |
| Initial temp.:                                                                                                                   | 80                                   | °C                   | Ion source temp.:                              | 200                       | °C                   |
| Ramping rate:                                                                                                                    | 1                                    | °C min <sup>-1</sup> | TIC scan range:                                | 35~250                    | m/z                  |
| Final temp:                                                                                                                      | 90                                   | °C                   | Threshold:                                     | 100                       |                      |
| Initial hold time                                                                                                                | 0                                    | min                  | <b>(c) Column (CP-WAX column, Varian, USA)</b> |                           |                      |
| Final hold time:                                                                                                                 | 5                                    | min                  | Length ( <i>l</i> )                            | 60                        | m                    |
| Total run time                                                                                                                   | 15                                   | min                  | Internal diameter ( <i>id</i> )                | 0.25                      | mm                   |
| Carrier gas:                                                                                                                     | He                                   | 99.999%              | Film thickness:                                | 0.25                      | µm                   |
| <b>C. GC/FID: Varian GC, Agilent Tech, USA; Column: CP-WAX (<i>l</i>: 30 m, <i>id</i>: 0.25 mm, and film thickness: 0.25 µm)</b> |                                      |                      |                                                |                           |                      |
| <b>(a) Oven setting</b>                                                                                                          |                                      |                      | <b>(b) Detector setting</b>                    |                           |                      |
| Initial temp                                                                                                                     | 75                                   | °C                   | Detector temp.                                 | 250                       | °C                   |
| Initial rate                                                                                                                     | 2                                    | °C·min <sup>-1</sup> | H <sub>2</sub> and N <sub>2</sub> flow         | 30                        | mL·min <sup>-1</sup> |
| Initial Hold                                                                                                                     | 1                                    | min                  | N <sub>2</sub> flow                            | 30                        | mL·min <sup>-1</sup> |
| Final temp                                                                                                                       | 90                                   | °C                   | Air flow                                       | 300                       | mL·min <sup>-1</sup> |
| Final Hold                                                                                                                       | 1.5                                  | min                  | Carrier gas N <sub>2</sub>                     | 1                         | mL·min <sup>-1</sup> |
| Total time                                                                                                                       | 10                                   | min                  |                                                |                           |                      |
| <b>D. Thermal Desorber (TD): UNITY, Markes International, Ltd., UK <sup>a</sup></b>                                              |                                      |                      |                                                |                           |                      |
| Cold trap:                                                                                                                       | Carbopack C + Carbopack B            |                      |                                                |                           |                      |
| split ratio:                                                                                                                     | 1:5                                  |                      | trap low:                                      | -10                       | °C                   |
| split flow:                                                                                                                      | 20                                   | mL·min <sup>-1</sup> | trap high:                                     | 300                       | °C                   |
| trap hold time:                                                                                                                  | 5                                    | min                  | flow path temp.                                | 120                       | °C                   |
| desorption time:                                                                                                                 | 10                                   | min                  | Desorption temp.                               | 300                       | °C                   |

<sup>a</sup> TD setup was identical for both GC/FID and GC/MS analysis.

**Table S3.** Basic quality assurance (QA) parameters for target MTs analyzed by both FID and MS.

| Order                                | Compounds    | MDL <sup>a</sup> |                                  |           |                     | RSE <sup>b</sup> (%) |      |
|--------------------------------------|--------------|------------------|----------------------------------|-----------|---------------------|----------------------|------|
|                                      |              | TD/GC/MS         |                                  | TD/GC/FID |                     | MS                   | FID  |
|                                      |              | Mass (ng)        | Concentration (ppb) <sup>c</sup> | Mass (ng) | Concentration (ppb) |                      |      |
| 1                                    | $\alpha$ -PN | 0.24             | 0.09                             | 0.38      | 0.14                | 0.50                 | 1.17 |
| 2                                    | CMP          | 0.23             | 0.08                             | 0.89      | 0.32                | 1.06                 | 0.5  |
| 3                                    | $\beta$ -PN  | 0.38             | 0.14                             | 0.72      | 0.26                | 3.76                 | 2.04 |
| 4                                    | 3-CN         | 0.40             | 0.15                             | 0.53      | 0.19                | 0.63                 | 4.04 |
| 5                                    | MRC          | 0.24             | 0.09                             | 0.54      | 0.19                | 1.67                 | 2.17 |
| 6                                    | $\alpha$ -PD | 0.25             | 0.09                             | 0.72      | 0.26                | 1.66                 | 1.10 |
| 7                                    | $\alpha$ -TP | 0.41             | 0.15                             | 0.64      | 0.23                | 2.23                 | 1.79 |
| 8                                    | R-LN         | 0.50             | 0.18                             | 0.62      | 0.22                | 0.83                 | 1.43 |
| 9                                    | $\gamma$ -TP | 0.34             | 0.12                             | 0.58      | 0.21                | 1.02                 | 2.48 |
| 10                                   | p-CM         | 0.29             | 0.11                             | 0.6       | 0.22                | 0.85                 | 0.66 |
| 11                                   | T            | 0.56             | 0.30                             | 0.43      | 0.23                | 2.12                 | 1.24 |
| Average MDL & RSE values for all MTs |              | 0.33             | 0.12                             | 0.62      | 0.22                | 1.42                 | 1.74 |

<sup>a</sup> MDL values were obtained by conducting seven replicate analyses of 1  $\mu$ L liquid standard; (5 ng· $\mu$ L<sup>-1</sup>) loaded on to ST with the supply of 0.5 L N<sub>2</sub> purging gas; <sup>b</sup> Derived by triplicate analyses of 1  $\mu$ L of liquid standard (5 ng· $\mu$ L<sup>-1</sup>) loaded on to ST; <sup>c</sup> DL values for gas standards were calculated in ppb unit assuming the total sample volume of 0.5 L.

© 2014 by the authors; licensee MDPI, Basel, Switzerland. This article is an open access article distributed under the terms and conditions of the Creative Commons Attribution license (<http://creativecommons.org/licenses/by/4.0/>).
